# Supplementary material
Source: publisher site journal article supplement (https://www.dovepress.com/article/309162)
Supplement: Supplementary file 1 [file get_supplementary_file.php]

**Supplementary figure 1.** Stacked bar chart showing the distribution of scores (from 1-5 where 1 is red, 2 is pink, 3 is white, 4 is light blue and 5 is blue) for each of the 14 parameters evaluated.


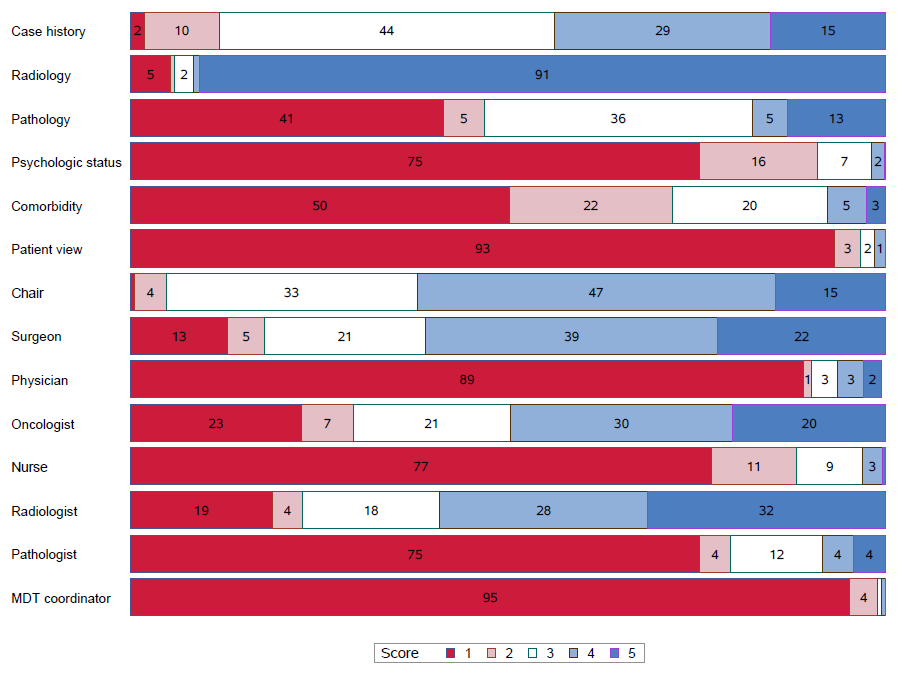


| **Supplementary table 1**. Inter-class correlation, kappa value and mean differences. | | | | | | | | | | |
| --- | --- | --- | --- | --- | --- | --- | --- | --- | --- | --- |
|  |  | | Inter-class | | Kappa | Mean | | | | |
|  |  | | correlation | | value | difference | | | | |
|  |  | | (95% CI) | | (95% CI) |  | | | | |
| Quality of information in case presentation | | | | |  |  | | | | |
|  | Patient history | | 0.00 (-) | | 0.07 (-0.02-0.16) | -0.82 (-0.02--0.62) | | | | |
|  | Radiology | | 0.17 (-0.02-0.35) | | 0.14 (-0.11-0.39) | -0.12 (-0.36-0.12) | | | | |
|  | Pathology | | 0.48 (0.32-0.61) | | 0.36 (0.24-0.47) | 0.94 (0.70-1.19) | | | | |
|  | Psychosocial | | 0.40 (0.23-0.55) | | 0.39 (0.23-0.55) | -0.03 (-0.18-0.13) | | | | |
|  | Comorbidity | | 0.37 (0.19-0.52) | | 0.30 (0.17-0.43) | 0.13 (-0.10-0.35) | | | | |
|  | Patient views | | 0.27 0.08-0.44) | | 0.20 (0.04-0.37) | 0.17 (0.06-0.28) | | | | |
| Quality of contribution to case discussions | | | | |  |  | | | | |
|  | Chair | | 0.16 (0.03-0.34) | | 0.14 (0.02-0.26) | -0.33 (-0.53--0.13) | | | | |
|  | Surgeon | | 0.80 (0.72–0.86) | | 0.64 (0.54-0.74) | -0.08 (-0.27-0.11) | | | | |
|  | Oncologist | | 0.61 (0.47-0.72) | | 0.52 (0.39-0.65) | -0.25 (-0.50-0) | | | | |
|  | Nurse | | 0.73 (0.63-0.81) | | 0.64 (0.52-0.76) | 0.09 (-0.03-0.21) | | | | |
|  | Radiologist | | 0.27 (0.08-0.44) | | 0.28 (0.15-0.40) | 0.79 (0.49-1.08) | | | | |
|  | Pathologist | | 0.52 (0.37-0.65) | | 0.47 (0.32-0.62) | 0.49 (0.25-0.73) | | | | |
| **Supplementary table 2.** Summary of studies that have applied the MDT-MODe instrument to MDTs in cancer care. | | | | | | | | | |  |  |  | |
| **Reference** | | **Country** | | **Diagnoses observed** | | | **Cases (n)** | **Meetings (n)** | **Observers (n)** | **Focus and conclusion** | | |
| Jalil et al. 201415 | | United Kingdom | | Urological cancer | | | 683 | 23 | 2 | Higher scores for cases where treatment decisions were reached. | | |
| Seretis et al. 201416 | | United Kingdom | | Colorectal cancer | | | 64 | 4 | 1 | Limited information on patient-related factors. | | |
| Shah et al. 201422 | | United Kingdom | | Colorectal cancer | | | 267 | 11 | 2 | Case history and radiologic information rated highest. Limited information on patient-related factors. | | |
| Soukup et al. 201617 | | United Kingdom | | Breast cancer, colorectal cancer, lung cancer, urologic cancer | | | 1045 | 40 | 4 | Psychosocial information and input from surgeons, radiologists, pathologists and oncologists positive predictors decision-making. Information on comorbidity and from nursies had negative impact | | |
| Hahlweg et al. 201718 | | Germany | | Dermatological, gastrointestinal, gynecological, head and neck cancer, liver and biliary tract, lymphoma and myeloma, neuro-oncological, non-entity-specific oncological, non-entity-specific surgical, thorax, and uro-oncological MDTs | | | 249 | 29 | 2 | Limited information on patient-related factors. Variability between specialists and teams. | | |
| Gandamihardja et al. 201820 | | United Kingdom | | Breast cancer | | | 346 | 10 | 3 | Limited information on patient-related factors. Case discussions biomedically focused. | | |
| Soukup et al., 201935 | | United Kingdom | | Breast cancer | | | 1335 | 30 | 1 | Quality of discussion lower in second half of the meeting | | |
| Lumenta et al. 201919 | | Austria | | Not specified | | | 244 | 27 | 3 | Favorable agreement in team discussions. | | |
| Rosell et al. 201923 | | Sweden | | Penile cancer, anal cancer, vulvar cancer | | | 134 | 9 | 4 | Case history, leadership and teamwork rated high. Limited information on patient-related factors. | | |
|  | |  | |  | | |  |  |  | Low involvement of care professionals. | | |
| Scott et al. 202021 | | United Kingdom | | Ovarian cancer | | | 223 | 4 | 1 | Decision-making process driven by patient history, tumor markers and radiology. | | |
|  | |  | |  | | |  |  |  | Limited information on patient-related factors. | | |
| Wihl et al., current study | | Sweden | | Neuro-oncology, hepatobiliary cancer, soft tissue sarcoma | | | 349 | 32 | 3 | Limited information on patient-related factors. Clinical correlations. | | |
